# Supplementary material for: Fibroblast Growth Factor 21 Relieves Lipopolysaccharide-Induced Acute Lung Injury by Suppressing JAK2/STAT3 Signaling Pathway
Source: Springer Nature journal article supplement (doi:10.1007/s10753-023-01905-3), 2023-10-21
Supplement: MOESM2 [file 26209842]

**Table 1** Primer sequences used for quantitative real-time polymerase chain reaction(RT-PCR)

| Gene name            |                                          |
|----------------------|------------------------------------------|
| human FGF21          | Forward: 5'-ATGGATCGCTCCACTTTGACC-3'     |
|                      | Reverse: 5'-GGGCTTCGGACTGGTAAACAT-3'     |
| mouse FGF21          | Forward: 5'-GATGACGACCAAGACACTGAAGCC-3'  |
|                      | Reverse: 5'-CTCCAGCAGCAGTTCTCTGAAGC-3'   |
| mouse IL-6           | Forward: 5'-GAGGATACCACTCCAACAGACC-3'    |
|                      | Reverse: 5'-AAGTGCATCATCGTTGTTTCATACA-3' |
| mouse IL-1 $\beta$   | Forward: 5'-ACTCCTTAGTCCTCGGCCA-3'       |
|                      | Reverse: 5'-CCATCAGAGGCAAGGAGGAA-3'      |
| mouse TNF- $\alpha$  | Forward: 5'-TGATCCGCGACGTGGAA-3'         |
|                      | Reverse: 5'-ACCGCTGGAGTTCTGGAA-3'        |
| mouse ICAM-1         | Forward: 5'-GCCTTGGTAGAGGTGACTGAG-3'     |
|                      | Reverse: 5'-AAGTGCATCATCGTTGTTTCATACA-3' |
| mouse VCAM-1         | Forward: 5'-TGCCGAGCTAAATTACACATTG-3'    |
|                      | Reverse: 5'-CCTTGTGGAGGGATGTACAGA-3'     |
| mouse $\beta$ -actin | Forward: 5'-CCGTGAAAAGATGACCCAGA-3'      |
|                      | Reverse: 5'-TACGACCAGAGCATAACAG-3'       |

FGF21: fibroblast growth factor 21; IL-6, interleukin-6; IL-1 $\beta$ , interleukin-1 $\beta$ ; TNF- $\alpha$ , tumor necrosis factor- $\alpha$ ; ICAM-1, intercellular cell adhesion molecule-1; VCAM-1, vascular cell adhesion molecule-1;

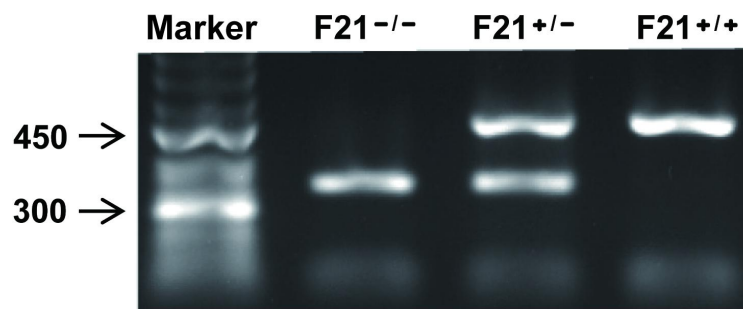

**Supplementary Fig.1** FGF21 knock out genetic identification: agarose gel electropherogram of FGF21 in mice

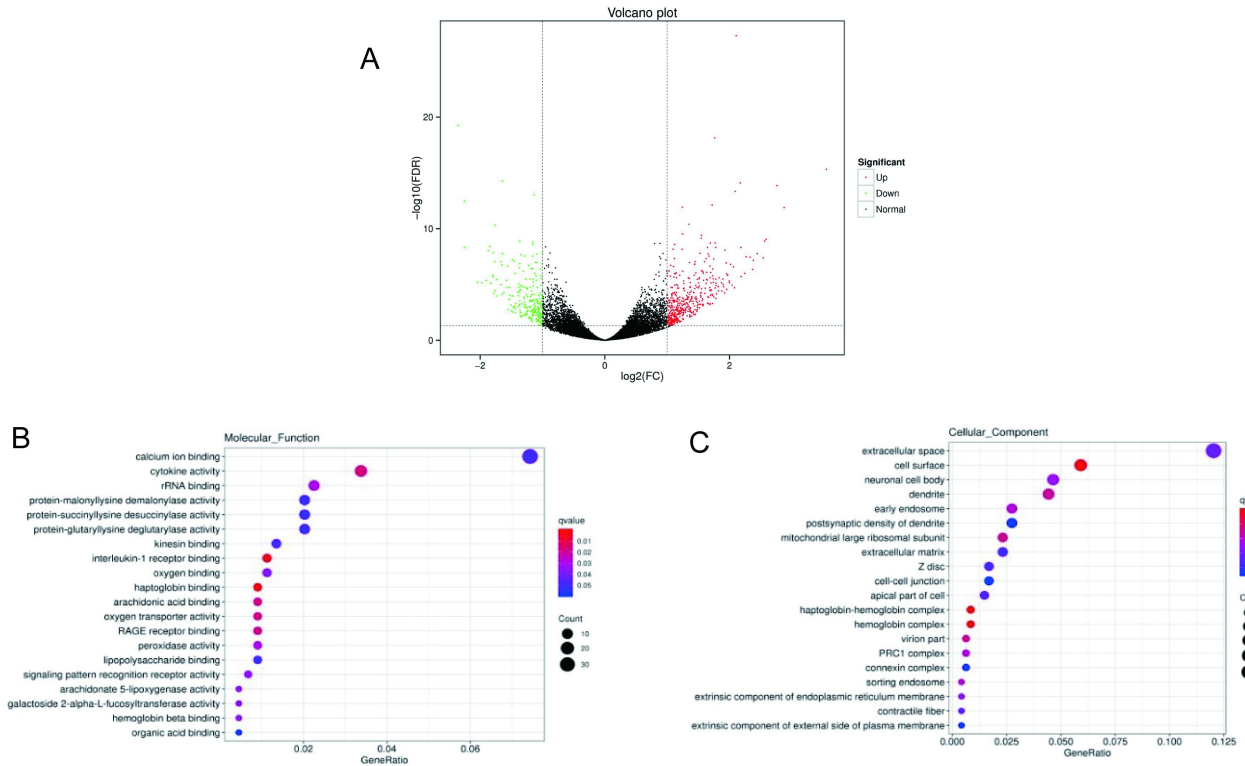

**Supplementary Fig. 2** RNA sequencing and bioinformatics analysis (A) The volcano plot of molecular function. GO enrichment analysis of molecular function (B) and cellular component (C).

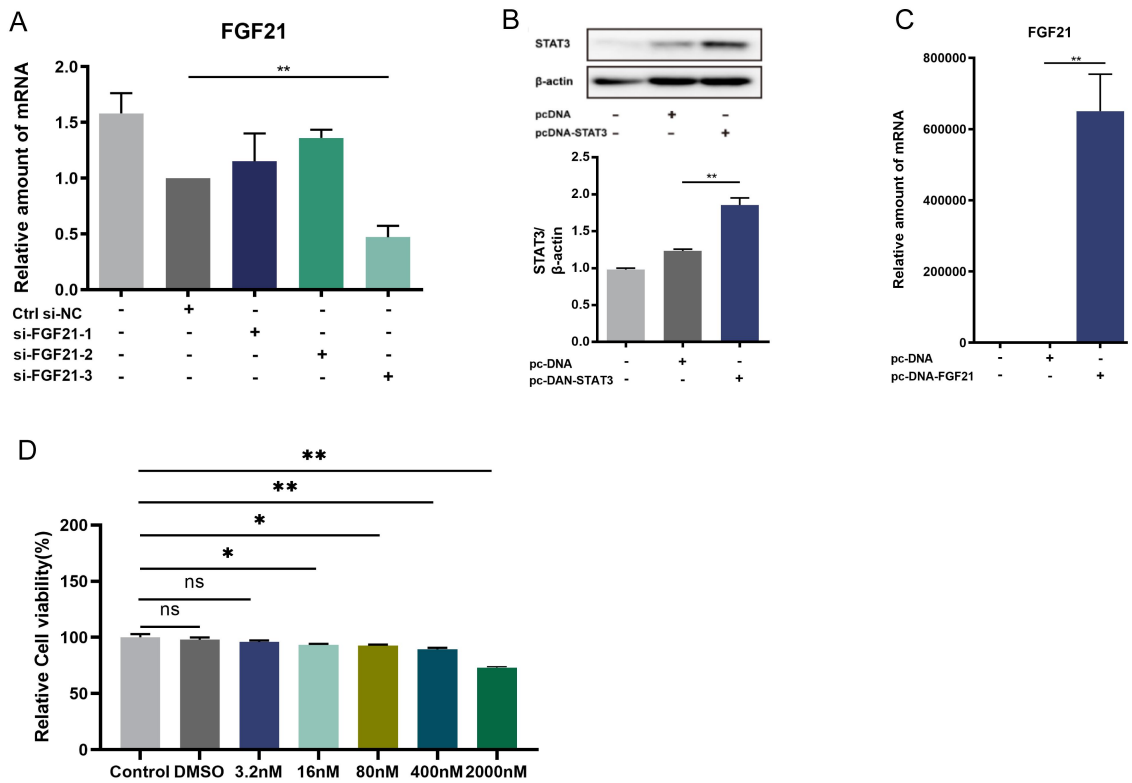

**Supplementary Fig. 3** Validation of Si-RNA overexpression plasma and CCK-8 test of Fedratinib (A) Validation of FGF21 silencing efficiency. (B) Verification of overexpression efficiency of STAT3. (C) Verification of overexpression efficiency of FGF21. (D) The CCK-8 test of Fedratinib on BEAS-2B Cells (n=3). Multiple comparisons were analyzed by one-way ANOVA. \*P < 0.01 and \*\*P < 0.05.
