# Supplementary material for: Fibroblast Growth Factor 21 Relieves Lipopolysaccharide-Induced Acute Lung Injury by Suppressing JAK2/STAT3 Signaling Pathway
Source: Inflammation. 2023 Oct 21;47(1):209–26. doi: 10.1007/s10753-023-01905-3 (PMC10799097; doi:10.1007/s10753-023-01905-3)
Supplement: Supplementary file 1 — Supplementary file1 (XLSX 38 KB) [file 10753_2023_1905_MOESM1_ESM.xlsx]

## Sheet: Sheet1
Up regurated genes (461)								Down regurated genes (232)
GeneSymbol	FDR	log2FC		GeneSymbol	FDR	log2FC		GeneSymbol	FDR	log2FC		GeneSymbol	FDR	log2FC
AC154187.2	4.76196e-16	3.55551		Mus_musculus_newGene_3018	1.16067e-12	1.24334		Irs1	5.54318e-20	-2.35158		Mus_musculus_newGene_2700	8.40921e-05	-1.17231
Mus_musculus_newGene_467	1.27672e-12	2.87544		Uchl3	6.8552e-09	1.23944		Mus_musculus_newGene_4021	3.43644e-13	-2.25448		Zkscan4	0.0125476	-1.17222
Apold1	1.37737e-14	2.76272		Kdm6b	0.0031989	1.23557		Glp1r	4.89711e-09	-2.25189		Mus_musculus_newGene_3535	0.000334299	-1.16984
Mus_musculus_newGene_1535	9.13302e-10	2.58789		Mus_musculus_newGene_1713	0.00171636	1.23386		Ankrd63	6.46429e-06	-2.04081		Pcdh1	7.94423e-05	-1.16917
Mus_musculus_newGene_4588	1.27397e-09	2.56481		Mus_musculus_newGene_678	0.00165901	1.23036		Sall1	7.01701e-06	-1.97343		Rec8	0.0205139	-1.16578
6430571L13Rik	4.11353e-08	2.54285		Hif1a	0.000296802	1.2292		Smad9	4.43694e-06	-1.89815		Mus_musculus_newGene_5923	0.00215377	-1.16568
Mus_musculus_newGene_4589	1.72838e-08	2.44564		Noct	0.000552792	1.22743		Mus_musculus_newGene_2414	9.39543e-09	-1.86899		Tppp	0.000270406	-1.16411
Mus_musculus_newGene_3055	7.02146e-08	2.38505		Marcksl1	0.00197692	1.22729		Ciita	3.79043e-09	-1.84719		Cbx8	0.00701562	-1.1614
Mus_musculus_newGene_6429	4.47252e-07	2.37063		Mus_musculus_newGene_6285	0.0193381	1.22308		Hykk	7.99217e-06	-1.82597		Efcc1	0.00587027	-1.15855
Ngp	3.68095e-08	2.33211		Adamts9	0.00264093	1.21995		Sox18	1.46791e-06	-1.8005		Fibin	0.00363443	-1.15853
Sfn	3.25165e-08	2.26614		Mus_musculus_newGene_2921	0.0194764	1.21994		Ppp1r1b	2.01864e-06	-1.79352		P2rx7	2.87966e-08	-1.15756
Mus_musculus_newGene_3756	1.00434e-06	2.246		Scrg1	0.00111221	1.2197		Zfp882	1.46944e-08	-1.79078		Ttc21b	0.00228445	-1.15749
Izumo1	1.89293e-06	2.18691		Rab8b	0.00135672	1.2186		Stra6l	5.82735e-05	-1.77891		Nox4	3.79214e-07	-1.15686
Itgb2l	4.80119e-09	2.18497		Ambp	0.00273964	1.21783		Acss3	9.12862e-08	-1.7664		Ccbe1	2.56949e-09	-1.15684
Retnlg	7.76171e-15	2.17374		Cldn4	0.00415881	1.2158		Kctd21	4.85028e-11	-1.76111		Trmt1l	1.61802e-09	-1.15666
Mus_musculus_newGene_1303	5.05355e-28	2.10696		Mus_musculus_newGene_5326	0.00795633	1.20555		Clec1a	3.60891e-05	-1.76065		Clca3a1	0.00188901	-1.15234
Bcl2a1b	4.59219e-14	2.09136		Egr1	0.00045045	1.20536		Zfp760	3.70554e-06	-1.7367		Dhdh	3.31605e-06	-1.15213
Il17f	1.98485e-05	2.08012		Nfil3	0.000135133	1.20417		Wnt3a	0.000108273	-1.73612		Dcun1d2	1.31636e-05	-1.15039
Ceacam10	2.66094e-07	2.06295		Selenon	0.000464755	1.20375		Rtkn2	9.11216e-08	-1.67014		Tek	0.00419628	-1.14977
Pnpla1	1.13228e-05	2.04198		Slc45a3	0.00209036	1.20315		Wscd1	1.04517e-05	-1.66698		Thsd1	0.000272843	-1.14722
Gdf15	1.5366e-07	2.01923		Slc7a11	0.0222028	1.20273		Zfp366	1.8279e-07	-1.65058		Pigh	5.75815e-06	-1.14517
Mus_musculus_newGene_1483	7.01701e-06	1.99911		Ubtd1	1.43849e-06	1.20167		L3hypdh	7.94423e-05	-1.64898		2810006K23Rik	0.0058795	-1.14363
Mus_musculus_newGene_5555	4.72888e-06	1.99573		Mmp25	0.00395921	1.19751		Tnfsf10	5.39653e-15	-1.64231		Senp8	0.000744129	-1.1418
Hba-a1	1.44325e-06	1.97265		Gpr27	0.000736064	1.19647		Tspan18	1.74888e-08	-1.64175		Ccdc8	0.00143366	-1.1414
Hba-a2	1.46791e-06	1.9668		Il10ra	0.000241397	1.1941		Atp7b	5.10485e-05	-1.6201		Zfp503	0.0018614	-1.13834
Mybph	2.68736e-05	1.95713		Gm6377	0.00300169	1.19405		Fam13c	4.19537e-06	-1.57327		Zswim5	0.003494	-1.1382
Hbb-bs	1.05369e-06	1.95393		Mus_musculus_newGene_2116	0.00227006	1.19398		Serpina10	1.91845e-05	-1.56713		Tubd1	0.000243474	-1.13619
Mus_musculus_newGene_821	1.21512e-07	1.94858		Mus_musculus_newGene_6461	0.0168188	1.19211		Pcdh18	2.19645e-07	-1.55814		Slc34a2	9.39706e-14	-1.13356
Olfm4	8.53746e-09	1.92638		Clec4e	0.00323482	1.19128		Gm28557	0.00172662	-1.55047		Mus_musculus_newGene_2213	7.94423e-05	-1.13309
Mus_musculus_newGene_7444	5.64366e-05	1.91993		Dusp16	0.00476849	1.19024		Mmp28	0.000214631	-1.53245		Eomes	0.00282317	-1.1306
Il12a	1.58363e-05	1.90497		Ptafr	0.00403089	1.18461		Apod	1.80832e-05	-1.52884		Zfp101	0.000506453	-1.12663
Mus_musculus_newGene_750	9.53437e-06	1.89936		Plk3	2.05392e-05	1.18449		Per3	9.45474e-05	-1.52197		Myb	0.00123949	-1.12365
Fosl1	3.3173e-06	1.89333		Il1f9	0.00117305	1.18258		Ccdc85a	0.000691396	-1.50751		Tgtp1	1.00434e-06	-1.12203
Mus_musculus_newGene_3149	3.695e-05	1.87759		Rnf19b	0.000496474	1.17801		2210418O10Rik	0.00231246	-1.50258		Gm5141	0.0031044	-1.11855
Mus_musculus_newGene_1071	7.01701e-06	1.87094		Mus_musculus_newGene_3465	0.0151338	1.17734		Fut10	5.90182e-08	-1.48357		Slc9a3r2	0.00253494	-1.11816
Csf3	2.44985e-06	1.8328		Mus_musculus_newGene_3134	0.00246987	1.17692		Tacr1	0.00010967	-1.48061		Notch4	0.0031044	-1.11815
Mus_musculus_newGene_6708	3.785e-05	1.82273		Timd4	0.000157938	1.17607		Gm14308	0.00291313	-1.47917		Adgrl4	0.00218152	-1.11427
Hbb-bt	1.50988e-05	1.81993		Gm20708	0.0161525	1.17471		Gas1	0.000107201	-1.47578		Stat1	1.07435e-07	-1.11317
Dnah17	1.58363e-05	1.81915		Fcnb	0.011092	1.1741		Lrrc26	0.00107117	-1.46584		Gpr17	0.00291458	-1.11266
Stx1b	6.71865e-05	1.79257		Dusp5	0.00156699	1.17219		Adra1a	0.00114473	-1.46053		Nkain4	0.000831368	-1.11158
Mus_musculus_newGene_2114	1.28172e-05	1.78396		Mus_musculus_newGene_1469	0.0126213	1.17058		Parp11	8.21838e-08	-1.45746		Rtp3	0.0053804	-1.10825
Hdc	7.76289e-06	1.78318		Krt87	1.27607e-05	1.17031		Mus_musculus_newGene_1882	0.000867937	-1.44851		Mus_musculus_newGene_4334	0.0120128	-1.10319
S100a9	4.94615e-09	1.7814		Syn1	0.0136336	1.17025		Tmcc2	1.05077e-06	-1.43962		Ptpru	0.000218785	-1.1031
Mus_musculus_newGene_4668	0.000177441	1.78128		C5ar1	0.0008051	1.16992		Zfp964	0.0014527	-1.43741		Irgm2	1.63619e-06	-1.10306
Fpr1	3.31605e-06	1.78103		Mus_musculus_newGene_1177	0.021179	1.16954		Fam57b	0.00337423	-1.43502		Ace	0.00175848	-1.10275
4930438A08Rik	2.05392e-05	1.7719		Mxd1	0.00187094	1.16928		Kcna2	0.000500798	-1.42949		Snx33	4.11332e-06	-1.09848
Ltf	1.93695e-09	1.77097		Ccrl2	0.00474035	1.16923		Hist1h2bg	4.89515e-05	-1.40046		Mfap2	0.0220221	-1.0957
Inhbb	7.6288e-19	1.76378		Padi4	0.00436307	1.16881		Grtp1	0.00107374	-1.38982		Zbtb3	0.0129998	-1.0954
Alas2	0.000131092	1.74752		Gjb2	0.00249006	1.16844		Lgi3	9.77183e-05	-1.3874		Apc2	0.0117454	-1.09242
Mus_musculus_newGene_210	5.15764e-08	1.74547		Ppp1r15a	2.14056e-05	1.16708		Gm14399	1.71653e-05	-1.37958		Zfp60	0.000359316	-1.09206
Cxcl2	6.28362e-06	1.74023		Rhof	0.000353902	1.16522		Gbp4	8.69394e-06	-1.37696		Ide	1.08353e-07	-1.09127
Lmnb1	3.05543e-06	1.73885		Gpr132	0.000744129	1.16428		Zkscan7	4.93459e-05	-1.37538		Megf6	1.87995e-08	-1.09087
Prr7	1.68104e-06	1.73209		Dusp2	0.000209592	1.1636		Mcf2l	3.16885e-07	-1.37218		Myzap	0.00342769	-1.08775
Egln3	4.00717e-07	1.73205		Phc3	0.00223168	1.16217		Mus_musculus_newGene_4261	0.000719785	-1.36895		Gbp10	0.000236545	-1.08557
Mus_musculus_newGene_7155	0.0005153	1.7289		Mus_musculus_newGene_7246	0.027195	1.16209		Cbx2	0.00060896	-1.36843		Cngb3	0.00448119	-1.08211
Mus_musculus_newGene_747	9.29865e-05	1.72745		Dph5	0.000169735	1.16158		Mus_musculus_newGene_282	3.46009e-05	-1.3677		Jcad	1.8108e-05	-1.08126
Ifitm6	7.40418e-13	1.72207		Gsta1	0.0116174	1.16146		Banp	1.27397e-09	-1.36387		Mus_musculus_newGene_2280	0.0177337	-1.0797
Pabpc1l	7.55984e-05	1.71885		Gm10382	0.0113486	1.15587		Meis1	1.3634e-07	-1.36197		Calcrl	0.00707047	-1.07767
Prkcg	3.03931e-05	1.7063		Mus_musculus_newGene_7359	0.0240913	1.15475		Kif26a	0.000287325	-1.36157		Rnf152	0.00142496	-1.07709
Hbegf	7.40938e-06	1.70303		Gm21149	0.00173716	1.1547		Clec9a	0.00199216	-1.36002		Paqr7	0.000485937	-1.07705
Evi2b	3.51917e-05	1.70246		Hoga1	0.000303228	1.15449		Ubd	0.00310254	-1.35647		Ticam2	0.000343207	-1.07521
Mus_musculus_newGene_4661	8.50189e-07	1.69777		Snai1	0.00126696	1.15405		Hlf	3.18403e-05	-1.35321		Dusp19	0.00105325	-1.07145
Mus_musculus_newGene_1892	9.25041e-05	1.69308		Adora3	0.000323528	1.15307		Syt15	0.00749205	-1.34905		Pkn3	0.00259723	-1.0663
S100a8	1.93695e-09	1.69092		Zswim4	0.00170396	1.15256		Etv5	1.28184e-05	-1.34772		Kantr	0.000529319	-1.06456
BC049352	0.000613367	1.6896		Mus_musculus_newGene_1814	0.00808717	1.15243		Gldc	0.00312935	-1.34638		Zfp108	0.0144013	-1.06442
Apol8	0.000529857	1.68938		F3	0.00105325	1.15097		Rps6ka5	2.1799e-08	-1.34061		Acvr2b	0.00830801	-1.06212
Gclc	2.44985e-06	1.68794		Tiparp	5.19216e-05	1.15087		Pcdh20	0.00585595	-1.33984		Zfp385b	0.00563908	-1.06211
Plaur	2.27716e-07	1.6868		Tm4sf1	2.52044e-06	1.15073		Thrsp	0.000513808	-1.32935		Ankef1	0.0447695	-1.0621
Ceacam18	1.93014e-05	1.68438		Fosl2	0.00521912	1.15072		Trim67	0.00732542	-1.32364		Zfp712	0.00119404	-1.06033
Osm	3.25931e-05	1.6838		Anxa1	1.02295e-05	1.15026		Hspa12b	1.53749e-05	-1.31743		Rab3c	0.0180554	-1.05958
Mus_musculus_newGene_3069	2.83527e-08	1.67012		Cd33	0.0020482	1.15023		Rsrp1	6.41269e-07	-1.3046		Gm12258	0.00166339	-1.05739
Egr3	0.000142772	1.6678		Ifitm5	0.00938197	1.15011		Exph5	0.000189617	-1.29708		Fbxo32	9.77183e-05	-1.05571
Prss22	0.000539973	1.65999		Lbx1	0.0164083	1.14984		Mus_musculus_newGene_1484	0.00532067	-1.2961		Gprin3	0.00198977	-1.05511
Cd14	1.86111e-08	1.65791		C130026I21Rik	0.0158409	1.14891		Kdr	0.000134963	-1.2957		Nrep	0.00125057	-1.05468
1700109H08Rik	0.000487912	1.65291		Cyr61	9.05316e-07	1.14531		Fv1	0.000610052	-1.2952		Myo18b	0.00410962	-1.05257
Mus_musculus_newGene_1455	0.000126942	1.65195		Mus_musculus_newGene_835	0.00943969	1.14531		Kank4	0.00534325	-1.29234		Tmie	0.0216175	-1.04824
Mus_musculus_newGene_6359	0.000456552	1.647		Kcnh7	0.0020751	1.14452		Eda2r	0.00112245	-1.28564		Rasal2	0.000526274	-1.04734
Cd177	4.89711e-09	1.64692		Spata13	0.0104184	1.14421		Coro2b	0.0003799	-1.28483		Kcnip3	0.00713421	-1.04548
Rab44	4.08279e-06	1.64453		Inhba	0.012344	1.14324		AW011738	2.87966e-08	-1.28438		Mus_musculus_newGene_7038	0.00310254	-1.04522
Mpp3	8.03966e-07	1.63484		Mus_musculus_newGene_2299	0.000103591	1.14251		Rap1gap	1.80832e-05	-1.28392		Neurl1b	0.00353045	-1.04474
Lilr4b	3.54181e-06	1.63321		Gm614	0.00955867	1.14154		Mus_musculus_newGene_1998	0.00579822	-1.27271		Dusp23	0.00979015	-1.04213
Tmem252	4.82743e-08	1.62625		Mus_musculus_newGene_2983	0.0146096	1.13938		Acad12	0.000786622	-1.26975		Cnnm3	0.000177441	-1.04181
Foxd4	7.85624e-06	1.62585		Alox5ap	1.05077e-06	1.13666		Fign	0.000794987	-1.26899		Gm14325	5.8753e-05	-1.03934
Samsn1	2.16317e-05	1.61078		Mus_musculus_newGene_815	7.76e-05	1.13539		Chrm2	0.00373581	-1.26569		Msx1	0.0105862	-1.03556
Mus_musculus_newGene_1559	6.18958e-05	1.60386		Gk	0.00175848	1.1344		Stard9	3.37039e-06	-1.26497		Zfp931	0.043126	-1.03408
Srgn	9.12862e-08	1.59889		Dll1	0.00794522	1.13406		Atm	7.97421e-05	-1.25653		AI464131	0.00417483	-1.03267
Cd80	4.18281e-06	1.58451		Crtam	0.0187655	1.13243		Klhl38	0.00135942	-1.25394		Sh3d19	3.90623e-07	-1.03253
Sec1	9.88087e-07	1.58104		Mgam	0.00622839	1.13213		Kcnj13	0.0044726	-1.25118		2610008E11Rik	0.000438249	-1.03174
Mus_musculus_newGene_4398	0.00060896	1.57911		Mus_musculus_newGene_5118	0.00367333	1.13072		Tef	0.00114271	-1.2492		Fam216b	0.00604827	-1.0315
Mus_musculus_newGene_7239	0.0008051	1.57425		Il1rn	0.00337203	1.12986		Stard8	2.40105e-05	-1.24888		Ncr1	0.0222907	-1.03054
Mmp8	7.28592e-07	1.57298		Basp1	0.000309977	1.1243		Itprid1	0.00275868	-1.24822		Mfap3l	1.55605e-06	-1.02893
Them5	0.000197031	1.57127		Stfa2l1	0.00803577	1.12414		Fancb	0.00248306	-1.2464		Gucy1a1	0.000857392	-1.02721
Abca13	0.000613367	1.57098		Mus_musculus_newGene_6046	0.0226212	1.12293		Acacb	2.03557e-05	-1.24415		Mras	1.13545e-05	-1.02626
Spatc1	0.000191188	1.56788		Wfdc21	1.13228e-05	1.12208		Ccdc141	2.62431e-05	-1.2438		Ska2	0.00086716	-1.02595
Cyp2t4	0.000287325	1.5627		Ier2	2.57906e-09	1.12134		Rptn	0.00479291	-1.2427		Zscan20	0.000340917	-1.02224
Odc1	6.14213e-07	1.55792		Il23a	0.0134632	1.12047		Epha7	0.00239979	-1.24024		Nhlrc1	0.00878267	-1.02109
Pdlim7	3.96644e-10	1.553		Lrp8	0.00446408	1.11939		Mus_musculus_newGene_7221	0.000122051	-1.23932		Arrdc3	8.14799e-05	-1.02087
Tubb6	5.95159e-07	1.55258		Mus_musculus_newGene_2343	0.033137	1.11904		Zfp354a	0.00213341	-1.2307		Cntfr	0.0306525	-1.0199
Trem1	2.37896e-05	1.55223		Metrnl	0.000259714	1.11904		Card10	1.98422e-07	-1.22185		Sdf2l1	0.000612679	-1.01758
Ackr3	6.98942e-10	1.54733		Rab20	4.88383e-05	1.11891		Mus_musculus_newGene_1267	0.00830801	-1.21527		Kif3c	2.7837e-06	-1.01737
Acr	5.33778e-05	1.54656		Mt1	4.82743e-08	1.11743		Ldlrad1	0.000940351	-1.2148		Eln	0.00935366	-1.017
Itpkc	0.000132021	1.54063		Cdr2	1.05077e-06	1.11715		Tmem221	0.0107947	-1.21465		Gprc6a	0.00474262	-1.01643
Mus_musculus_newGene_3068	0.000135876	1.54063		Espnl	0.0142714	1.11714		Mboat2	0.00108893	-1.20806		Cdh2	0.0013621	-1.01605
Sdcbp2	9.25639e-05	1.53799		Sdc4	0.000370651	1.11688		Kcnk3	0.000298612	-1.20646		9330159F19Rik	0.016119	-1.01362
Mus_musculus_newGene_1466	0.000585189	1.53641		Bhlhe41	0.00379148	1.11377		Mus_musculus_newGene_6276	0.00984957	-1.19981		Zfp329	0.000328352	-1.01354
Gm49391	5.8753e-05	1.53414		Pde2a	0.0117363	1.1127		Nxpe3	3.3173e-06	-1.19596		Mus_musculus_newGene_7425	0.0236507	-1.00832
Mus_musculus_newGene_4355	1.58841e-08	1.52719		Bcl2a1a	6.45518e-05	1.11207		Hif3a	0.000259894	-1.1959		Zfp866	1.45196e-07	-1.00716
Mus_musculus_newGene_4772	0.000598276	1.52444		Pde4d	0.00232519	1.11202		Dnajc28	1.74116e-05	-1.19503		Myh7	0.00519717	-1.00433
Mus_musculus_newGene_1822	0.00120198	1.52079		C1qtnf9	0.0054483	1.1111		Mus_musculus_newGene_444	0.000124149	-1.18994		Pknox2	0.00225789	-1.00196
Mus_musculus_newGene_831	0.000303228	1.51716		Cd300lf	0.00105425	1.11092		Mettl21e	0.00258557	-1.18837		Fam214a	0.000129911	-1.00179
Tes	1.42369e-05	1.51603		Nim1k	0.0073077	1.11083		Fmo3	0.0100313	-1.18767		Gm14288	0.000187746	-1.00137
Rcan1	2.43335e-06	1.5156		Mus_musculus_newGene_2912	0.021179	1.11036		Gm14326	0.000976505	-1.18605		Sgpp2	0.000146944	-1.00122
Cass4	2.99686e-06	1.51476		Has1	0.0187078	1.1099		Mus_musculus_newGene_1645	0.0159078	-1.18289		Fam102b	1.43003e-08	-1.00055
P2ry2	7.11789e-06	1.50769		Brinp1	0.00754691	1.10947		Tgtp2	3.81318e-07	-1.18045		Slc25a35	0.00187376	-1.00019
Alox5	1.98485e-05	1.50304		Avpi1	2.18283e-06	1.10844		Zbtb16	0.00030697	-1.17791
Mus_musculus_newGene_1594	0.0006082	1.49957		Plat	0.000302811	1.10715		Kank3	0.00213341	-1.17511
Fam83a	0.00118276	1.48748		Map2k3	0.000368745	1.10457		Higd1b	0.000323594	-1.17417
Mus_musculus_newGene_7277	0.000415095	1.48713		Rnf122	0.00211003	1.10357		Prrg3	3.87789e-05	-1.17384
Cdk5r1	0.0017062	1.48644		Hivep3	0.0150916	1.10324
Clec4d	3.54181e-06	1.48561		Mdfi	0.000239793	1.10302
Sgms2	0.000815294	1.48333		Creb5	0.00599873	1.10289
Mus_musculus_newGene_3669	0.00267796	1.4784		Dbn1	2.42869e-07	1.10124
Mus_musculus_newGene_3445	1.73326e-05	1.47816		Mus_musculus_newGene_830	0.0390805	1.10004
Fut2	0.000182812	1.47764		Mus_musculus_newGene_7193	0.0200518	1.0995
Mus_musculus_newGene_610	0.00221296	1.47735		Mus_musculus_newGene_7434	0.0236512	1.09884
Areg	0.000328208	1.46965		Mrgpra2a	0.0402007	1.09747
G0s2	0.000128999	1.46311		Mt2	6.8552e-09	1.09589
Srxn1	0.000209592	1.4624		Mus_musculus_newGene_1110	0.00545898	1.0951
Fpr2	9.11622e-07	1.46044		Mus_musculus_newGene_1619	0.00168671	1.09361
Gm49339	1.19479e-05	1.45892		Trib1	0.00195525	1.09235
Islr2	0.00452155	1.45091		Evi2a	0.000161151	1.09145
Tfpi2	0.00183374	1.44784		Rilpl2	5.59559e-05	1.09021
Eva1a	8.95213e-08	1.44781		Sh2b2	0.016594	1.08954
Il1rap	0.000162167	1.44707		Id2	1.86474e-05	1.08504
Thbs1	0.00483531	1.44692		Mast4	0.0125904	1.08415
Artn	2.37896e-05	1.44428		Mmp12	0.00445445	1.08376
Il1r2	1.52667e-07	1.4435		Mapk6	0.00496538	1.08362
Serpinb1a	1.57573e-07	1.44196		Mus_musculus_newGene_1302	0.00325998	1.08347
Ccl3	0.000831024	1.43985		Mus_musculus_newGene_3192	0.00105325	1.08218
Slc16a13	1.46791e-06	1.43476		Esr1	0.0287742	1.08213
Mus_musculus_newGene_6330	0.00492409	1.43013		Mus_musculus_newGene_1926	0.0128435	1.08172
Ctse	5.33778e-05	1.42982		Mus_musculus_newGene_7242	0.0212856	1.08159
Zc3h12a	4.85173e-05	1.42438		Mus_musculus_newGene_820	0.0169651	1.08157
Mus_musculus_newGene_910	0.00246987	1.42032		Fos	0.000286878	1.08157
Ccl11	0.000522201	1.41872		Dusp1	0.00079949	1.08055
Ereg	0.00347499	1.41795		Soat2	0.00386847	1.08019
Mus_musculus_newGene_848	0.000318442	1.41504		Mus_musculus_newGene_7199	8.12914e-05	1.07756
Lilrb4a	0.000126942	1.39777		Mus_musculus_newGene_1841	0.0151252	1.07718
Tarm1	0.000177877	1.39762		Mus_musculus_newGene_7135	0.0437705	1.07654
Socs3	0.000122314	1.39502		Gm38431	0.0185209	1.07616
Slc27a4	0.000177441	1.39423		Mus_musculus_newGene_5008	0.0118048	1.07539
Camp	0.0068797	1.39399		Gm13889	0.000109704	1.07506
A530032D15Rik	0.00340991	1.39387		Mapkapk2	0.000457254	1.07318
Bhlhe40	4.01582e-05	1.38715		Csf2ra	0.000857392	1.07271
Tslp	0.00302553	1.38459		Mus_musculus_newGene_6013	0.0365956	1.07186
Plek	0.000308459	1.38333		Ccdc86	7.11461e-05	1.07177
Txnrd1	0.000206664	1.38279		Stat4	0.00402231	1.07099
Inava	0.00123452	1.37729		Rspo1	0.0147982	1.07097
Rabgef1	1.62064e-05	1.37503		Mus_musculus_newGene_4289	0.0211442	1.07065
Mus_musculus_newGene_1045	0.00197905	1.37481		Mus_musculus_newGene_3688	0.0148644	1.0702
Fam169b	0.000277748	1.37088		Mmp13	0.0137349	1.0685
Rdh12	6.86354e-06	1.37019		Pgm2	0.0020482	1.0682
Snca	0.00232519	1.36999		Pde4b	0.00623024	1.06813
Mus_musculus_newGene_5754	0.00810038	1.36933		Hamp	0.0211566	1.06807
Adam8	5.06936e-05	1.36737		Smox	0.00991137	1.06735
Mrgpra2b	0.00144317	1.36662		Mmp27	0.00915305	1.06634
Mus_musculus_newGene_704	0.00595882	1.36446		Mus_musculus_newGene_7250	0.0241471	1.06617
Sema4c	1.80832e-05	1.36422		Hk1	0.000726468	1.06612
Fbxw10	0.0078764	1.36366		B3gnt5	0.0106524	1.0651
Stc1	0.00539946	1.36146		Slpi	1.8108e-05	1.06357
Mus_musculus_newGene_5564	0.00267796	1.35966		Kcne3	0.0292098	1.0632
Mus_musculus_newGene_6306	1.07435e-07	1.35963		Slc15a3	0.00584519	1.06314
Mus_musculus_newGene_5074	0.000376459	1.35874		Entpd3	0.00135942	1.06205
Smim3	7.76318e-05	1.35682		Mus_musculus_newGene_2139	0.0234629	1.06196
Slfn1	2.86361e-06	1.35583		Mus_musculus_newGene_4786	0.000163138	1.06145
Serpinb2	0.00102005	1.35412		Mus_musculus_newGene_6605	0.0454192	1.06138
Tmem156	3.94415e-11	1.35273		Mus_musculus_newGene_5521	0.0289577	1.05947
Mus_musculus_newGene_1610	0.00163114	1.35176		Tet2	0.0203343	1.05914
Dgat1	0.000137502	1.34649		Mus_musculus_newGene_4560	0.00249859	1.05845
Hspb1	2.53351e-06	1.33922		Hist1h1c	1.98422e-07	1.05835
Ramp3	0.000862734	1.33593		Mus_musculus_newGene_4255	0.00567938	1.05687
Sh2d5	0.000638964	1.33403		Gm9817	0.030663	1.05188
Oacyl	0.000215591	1.33319		Mus_musculus_newGene_2756	0.0270127	1.05157
Rel	0.00249006	1.33254		Sycp2	0.0115507	1.05028
Akap12	0.000128764	1.33208		Cirbp	1.79437e-06	1.05005
Mus_musculus_newGene_3659	0.000155742	1.3296		Themis2	0.0120923	1.04889
Cxcl3	5.40986e-05	1.32943		Medag	0.00110931	1.04875
Map3k8	0.000189183	1.32401		Rnf149	0.000282631	1.04559
Entpd1	0.000482951	1.3238		Tnfaip3	0.0171925	1.04434
Fam83d	0.0061677	1.32164		Glrx	0.000430332	1.04328
Serpina3k	0.00117712	1.31823		Far2	0.00312475	1.04264
Lpcat2	0.000214631	1.31772		Wisp1	0.0356828	1.04237
Nfkbiz	0.00111801	1.31367		Ripor3	0.0125247	1.0423
Ccr1	9.77183e-05	1.31273		Mus_musculus_newGene_3362	0.0113777	1.03953
AA467197	0.000442684	1.31057		Mus_musculus_newGene_1612	0.00866592	1.03915
Dach1	0.00108983	1.30654		Gapt	0.000877384	1.03807
Nr4a1	0.00167007	1.29795		Abtb2	0.00384173	1.0375
Asprv1	0.000225721	1.29674		Adm	0.0133785	1.03693
Rhov	0.00218724	1.29442		Tpd52	0.000427033	1.03509
Mus_musculus_newGene_6205	0.00310254	1.29094		Mamstr	0.00426059	1.03254
Il1b	0.0015859	1.28969		St3gal6	0.00024462	1.03246
Clec5a	0.000222653	1.28839		Mus_musculus_newGene_3610	0.0411016	1.03215
Rassf10	0.000658553	1.28799		Msantd1	0.0266326	1.03179
Tgif1	0.000500798	1.28563		Mus_musculus_newGene_1855	0.00979015	1.0316
Chd7	0.000526274	1.28369		Antxr2	0.00676621	1.03139
Ppm1j	3.51917e-05	1.27697		Mus_musculus_newGene_4213	0.00676543	1.0311
Dennd4a	0.00226452	1.27152		Nts	0.0447619	1.02946
Myc	2.14978e-05	1.27077		Msra	6.4954e-07	1.02928
Kcne4	8.17985e-06	1.26958		Rflnb	6.19813e-07	1.02774
Tlr2	0.00198465	1.26927		Ttc9	0.00659079	1.02767
Mus_musculus_newGene_5935	0.000307407	1.26853		Hcar2	0.0176564	1.02458
Rhou	4.7247e-06	1.26539		Actg1	0.000290058	1.0241
Mus_musculus_newGene_3743	0.00443757	1.26246		Ctla2b	0.00191093	1.02245
Mus_musculus_newGene_1613	0.00323482	1.2622		Gpr84	0.0147487	1.02082
Mus_musculus_newGene_5902	0.00468436	1.26203		Urah	0.000828628	1.02015
Ralgds	0.00060365	1.26171		Mus_musculus_newGene_4328	0.0253063	1.01623
Il10	0.0133364	1.2602		Cd69	0.0075804	1.01589
Wfdc17	2.3932e-05	1.25996		Gja1	0.00586959	1.0154
Mus_musculus_newGene_4883	0.00440605	1.25845		Pcdhgb4	0.00944525	1.01395
Cd53	0.000328656	1.25736		Tgm1	0.0185232	1.01262
Ndrg1	0.000354621	1.2548		Slc9a3r1	0.000177473	1.0109
Gjb1	0.00200273	1.25433		Mus_musculus_newGene_6221	0.0335257	1.0105
Rhoh	0.000189617	1.25383		Arsi	0.0332926	1.01036
Clec7a	0.000163816	1.25126		Tnfrsf12a	0.000492306	1.00941
Stfa2	0.0120638	1.2507		Ptpn1	0.000801028	1.00687
Ly6g	6.41269e-07	1.24833		Cd209a	0.0205952	1.00664
Mus_musculus_newGene_5732	0.00151977	1.24773		Mus_musculus_newGene_647	1.00322e-06	1.00097
A3galt2	0.0121353	1.24753		Gsr	7.97122e-05	1.00027
Rasd1	3.00846e-10	1.24722
Il18rap	0.000771648	1.24705
Mus_musculus_newGene_598	0.00142049	1.24686
Il1a	0.00611014	1.24506
Mus_musculus_newGene_4397	0.00166339	1.24498
